# Supplementary material
Source: MDPI journal article supplement (https://www.mdpi.com/2311-7524/8/3/194)
Supplement: s1 [file s1]

**Table S1:** Primer sequences used for qRT-PCR

| Primer Name | Primer Sequence(5'-3')  |
|-------------|-------------------------|
| COR47-F     | GAGGAAGGAGACGATGAAGG    |
| COR47-R     | CCTTCTTCTGCTCCTCTGTGTAG |
| COR1-F      | CCAATAATGTAGTGCGTCGTT   |
| COR1-R      | TACTGGGTCGGGTGGATGAGA   |
| COR3-F      | TTGGTCACATAGTGGCTTAC    |
| COR3-R      | CACAACAGGGTGGATCAAAA    |
| HSF-F       | TTAGAGGATGAGATGGAGAG    |
| HSF-R       | GACGACGAAGTTGATGAC      |
| CBF4-F      | CGAAGAAGAGGGCGGGAAGGA   |
| CBF4-R      | CGGCTCACGAACCTCGCAAAC   |
| DREB1B-F    | CCAGTTGGTTCGGATTTGC     |
| DREB1B-R    | CGTCTTCTTGTTTCGGCTCA    |
| DREB1E-F    | TCAGGAAGTCGCCAAGATA     |
| DREB1E-R    | CGAGGTGGAGATAGCAGTA     |
| DREB2A-F    | ATAGACCAGCGAAGAGTAA     |
| DREB2A-R    | CCTTGCGTATCTTATCACC     |
| NCED1-F     | TTGTGGAATGCGTGGGAGG     |
| NCED1-R     | CAGCAATGGCGAGATAAGC     |
| NCED3-F     | TGGTCGTGATAGGGTCGTGTA   |
| NCED3-R     | GCTTCCAAATTCATCTGCTCC   |
| CYP707A1-F  | ACATTACCACAGCCCAGAG     |
| CYP707A1-R  | GCGCCAACAATAGACCACCT    |
| CYP707A2-F  | CAACTTACCCTGTAGGCA      |
| CYP707A2-R  | TGAACCACCTTCTTTAGC      |
